# Supplementary material
Source: PubMed Central journal article supplement (PMC2877163)

## Supporting Information

### FIGURE CAPTIONS

**Figure S1.** XRR curves of gradually degraded RHB/DNA/RHB and RHB/DNA/polyplex films. The curves are shifted vertically by a factor of 10 for clarity. The arrow represents the minimum in the fitted curve which provides information about the thickness, roughness, and density of the films. All DTT solution concentrations are 20 mM.

**Figure S2.** Disassembly of RHB/DNA/polyplex films with no NaCl concentration present in the DTT solution.

**Figure S1**

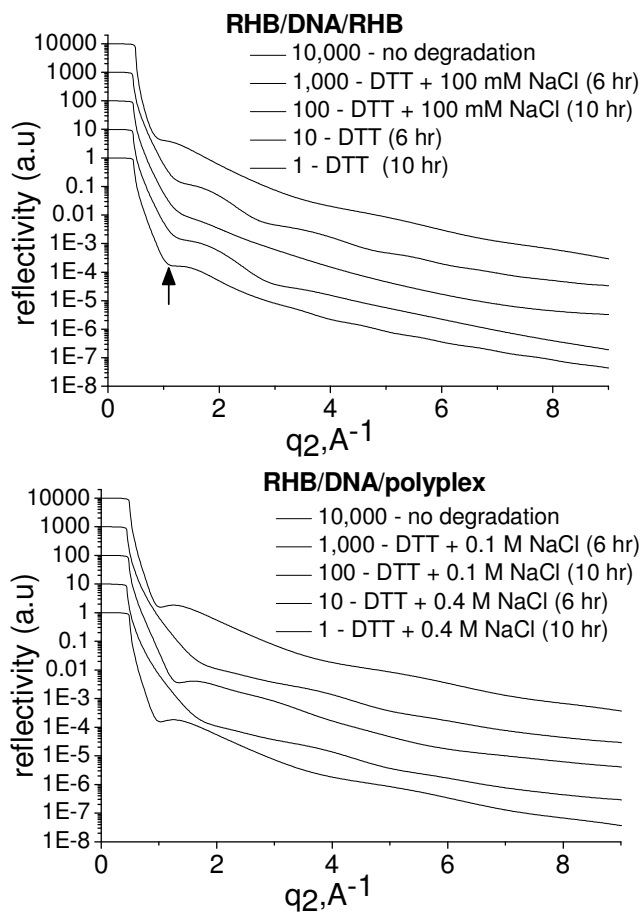

**Figure S2**

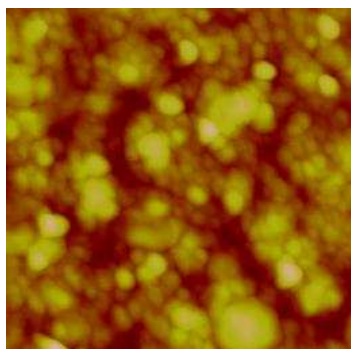

Supplement: NIHMS177160-supplement-1_si_001.pdf [file NIHMS177160-supplement-1_si_001.pdf]
